# Supplementary material for: Exopolysaccharide production by Lactobacillus plantarum T10 is responsible for the probiotic activity in enhancing intestinal barrier function in vitro and in vivo
Source: Royal Society of Chemistry journal article supplement (doi:10.1039/d4fo00526k), 2024-01-01

**Fig.3** IPEC-J2 cells were pretreated with *L. plantarum* T10 (CS) and its fermentation supernatant (FS) and EPS for 3 h respectively and were subjected to a 6-hETEC challenge.

In IPEC-J2 cells, Western Blotting of occluding and claudin-1

1.

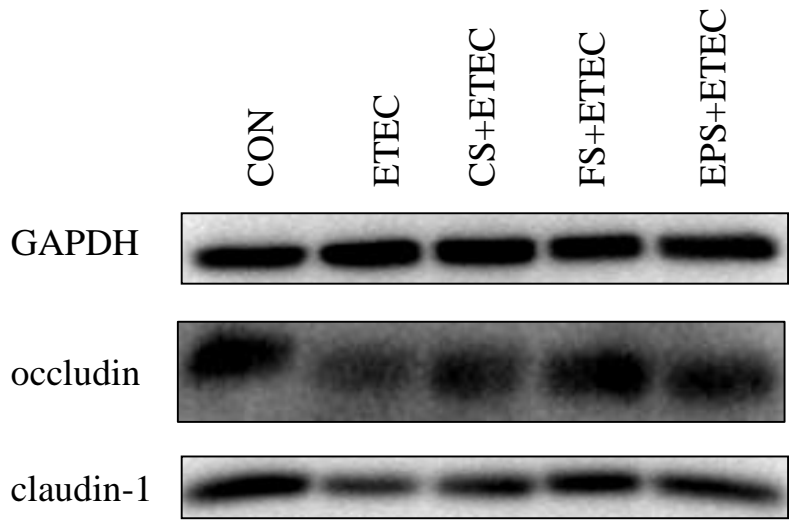

2.

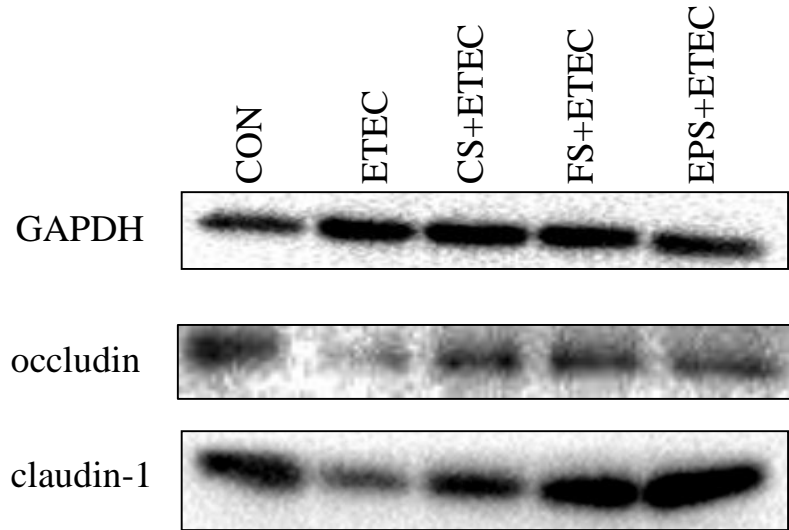

3.

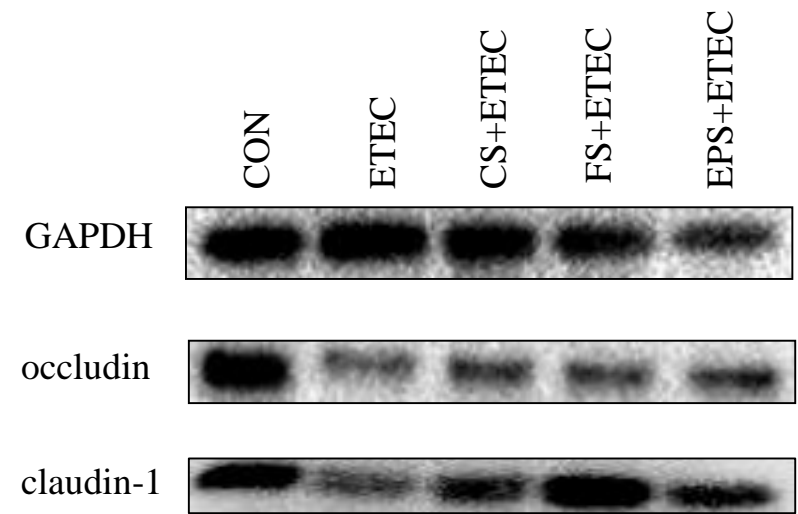

Results of 3 independent experiments

The following is the original plot of the above bands

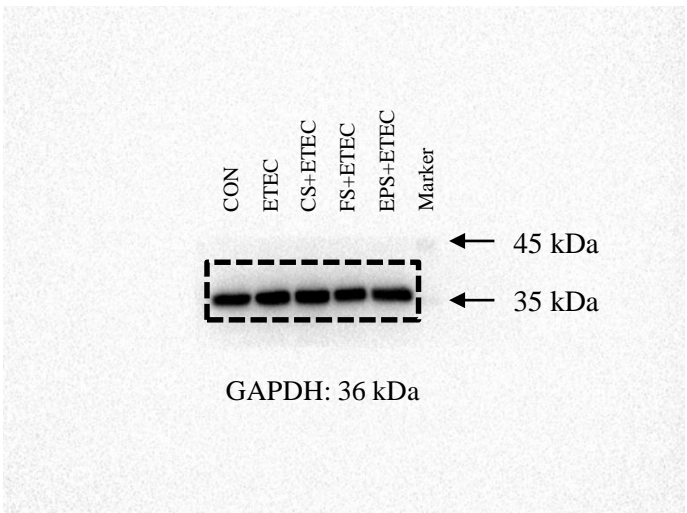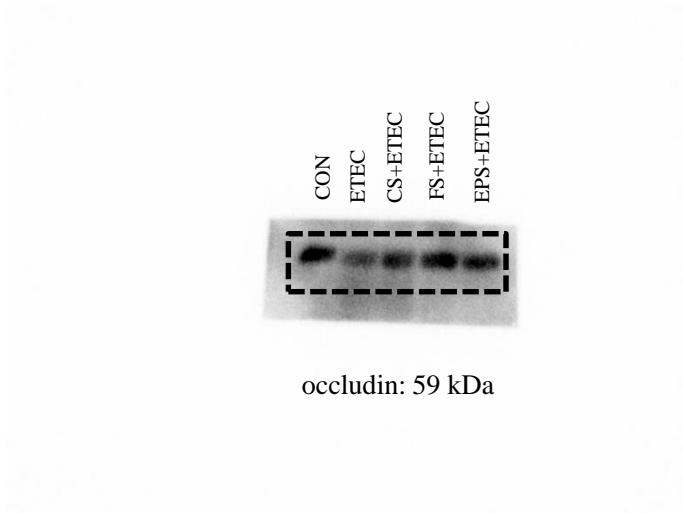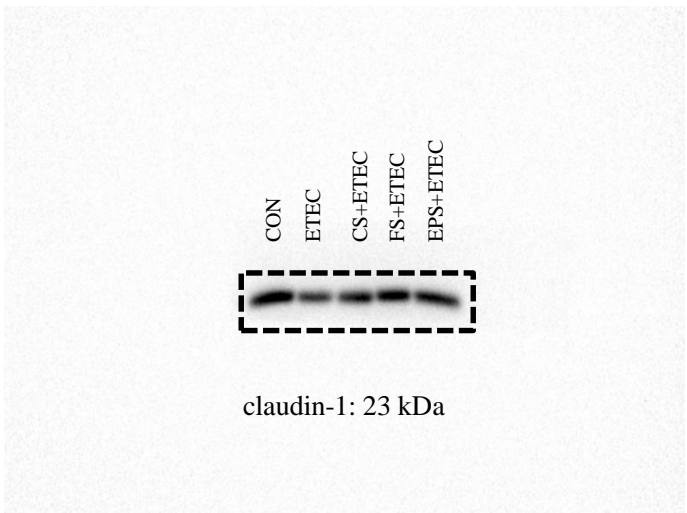

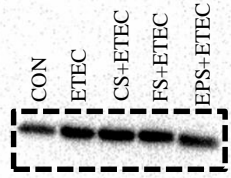

GAPDH: 36 kDa

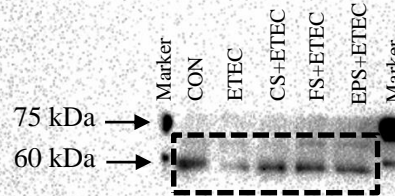

occludin: 59 kDa

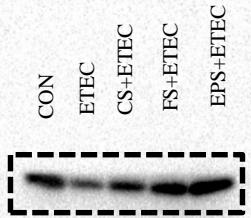

claudin-1: 23 kDa

3

GAPDH

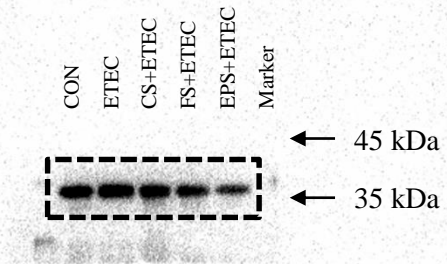

GAPDH: 36 kDa

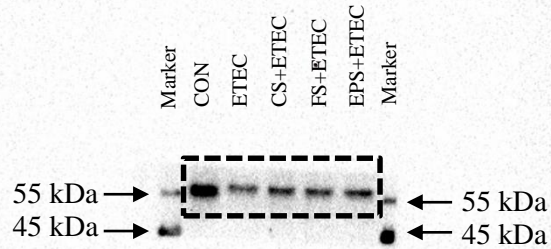

occludin: 59 kDa

claudin-1

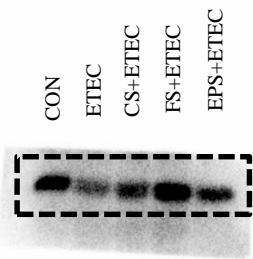

claudin-1: 23 kDa

Western Blotting analysis for p38 and p-p38

# Results of three independent experiments

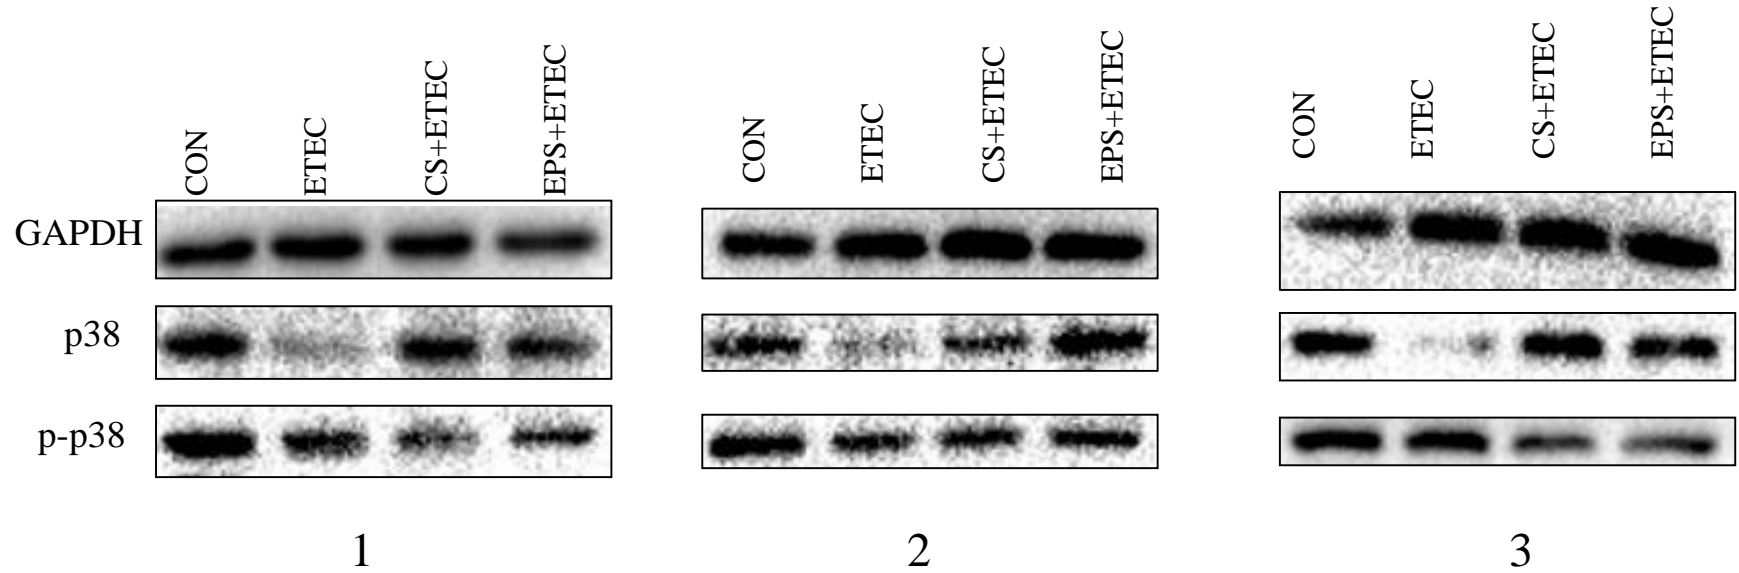



The following is the original plot of the above bands

1

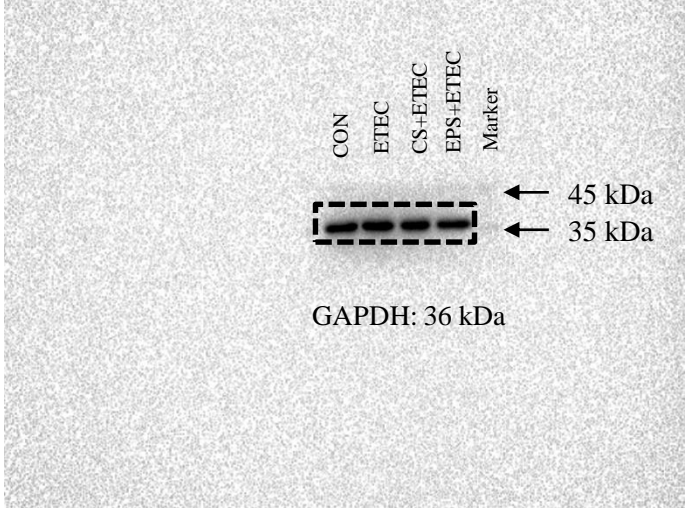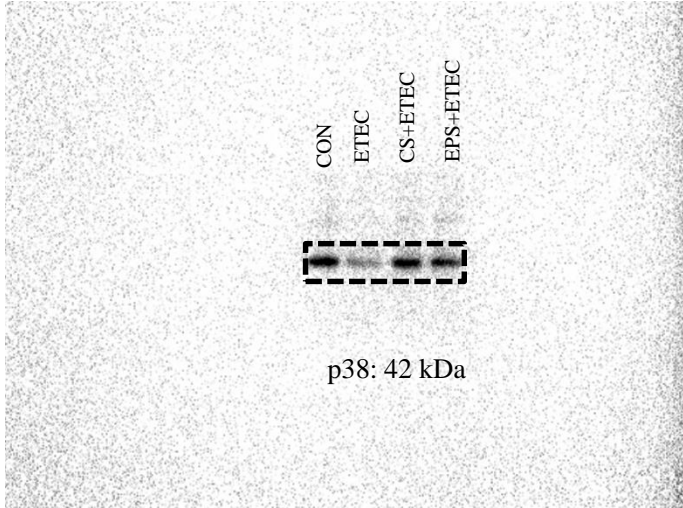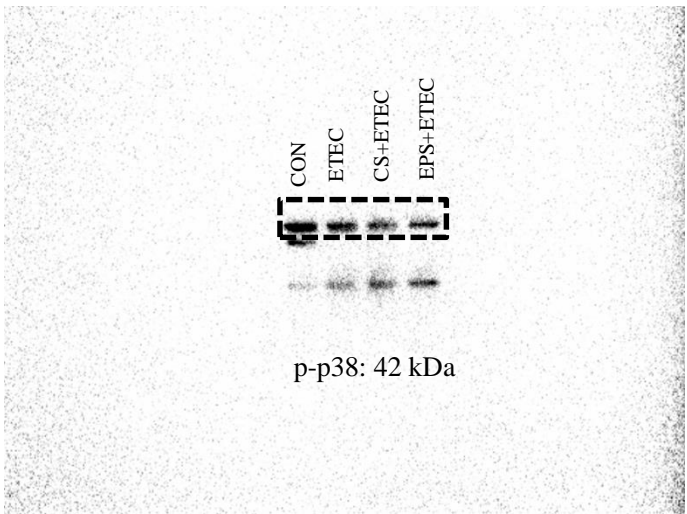

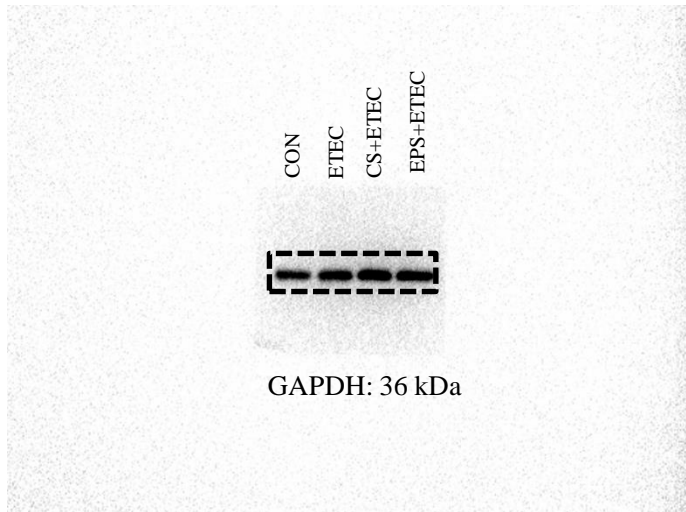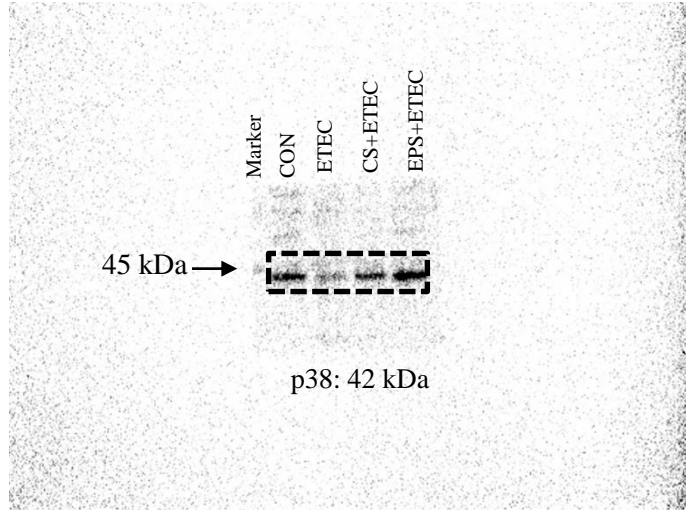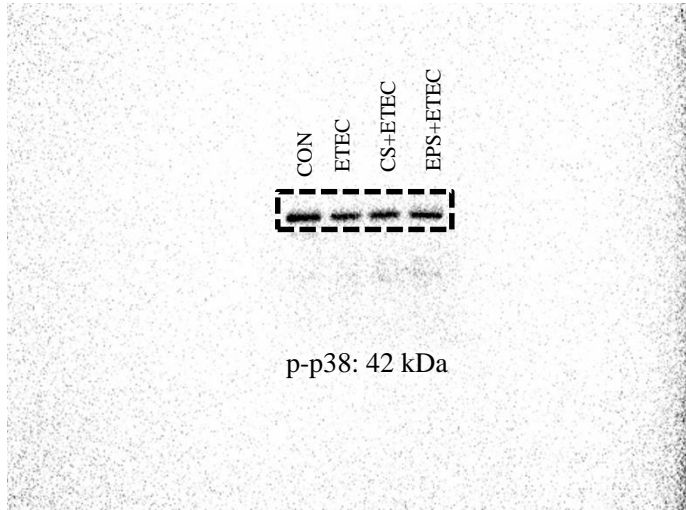

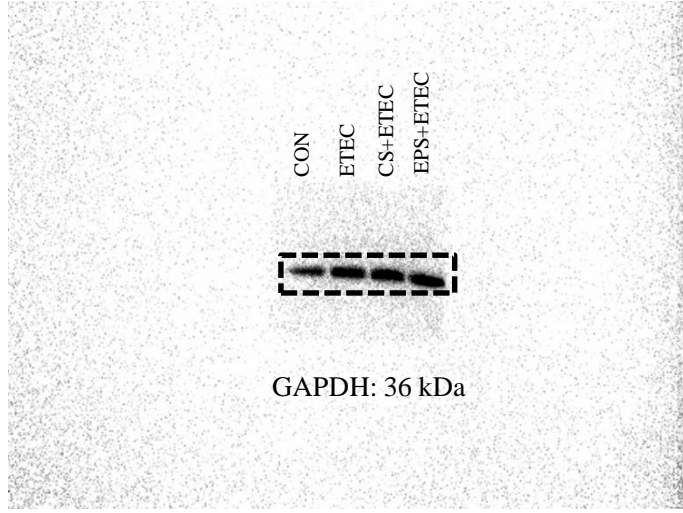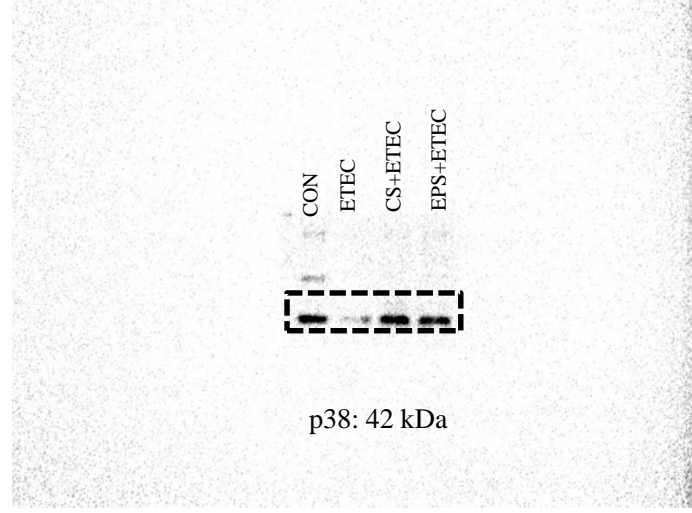

p-p38

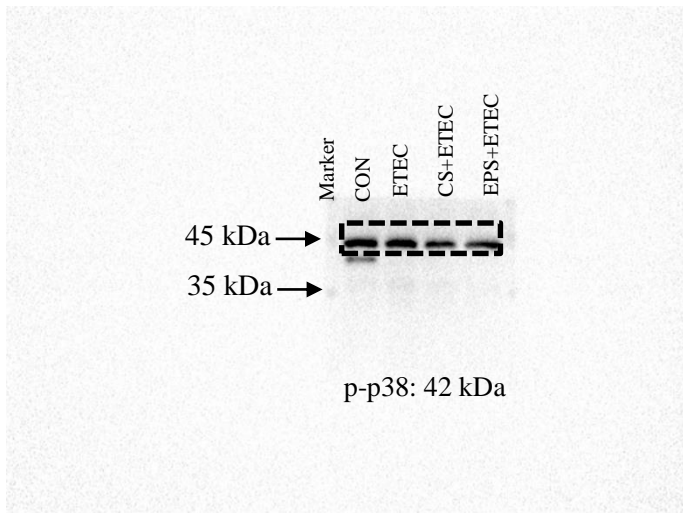

Supplement: d4fo00526k2.pdf [file d4fo00526k2.pdf]
