# Supplementary material for: Exopolysaccharide production by Lactobacillus plantarum T10 is responsible for the probiotic activity in enhancing intestinal barrier function in vitro and in vivo
Source: Royal Society of Chemistry journal article supplement (doi:10.1039/d4fo00526k), 2024-01-01

**Fig.1** Impact of Lactobacillus strains on IPEC-J2 cells' production of tight junction proteins.

occludin and claudin-1 were analyzed by Western blotting in IPEC-J2 cells

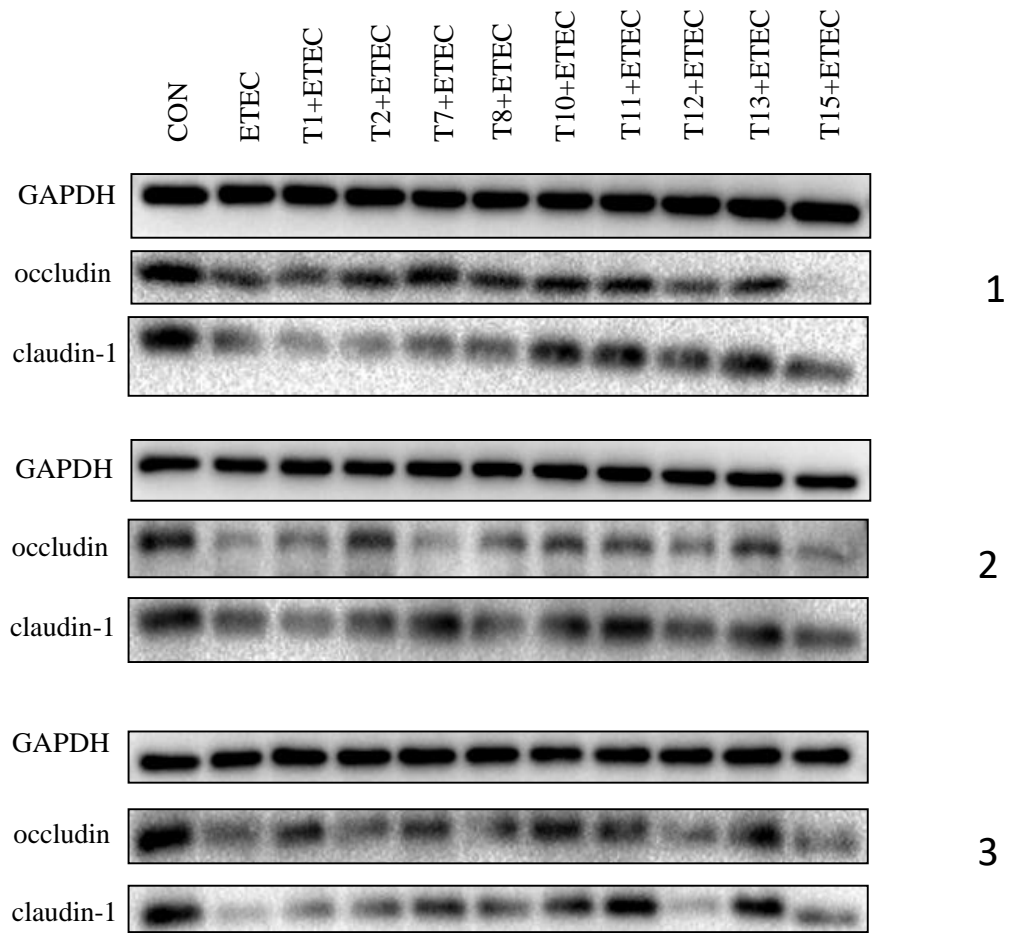

Three independent experiments were performed

The following is the original plot of the above bands

1

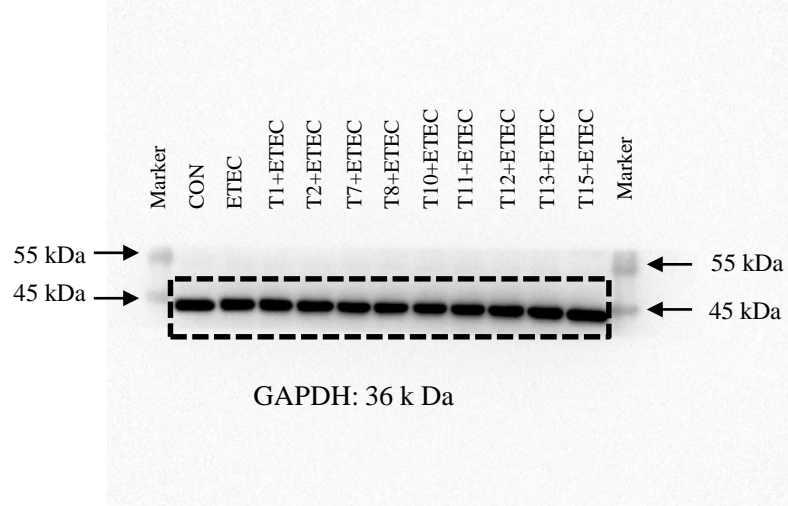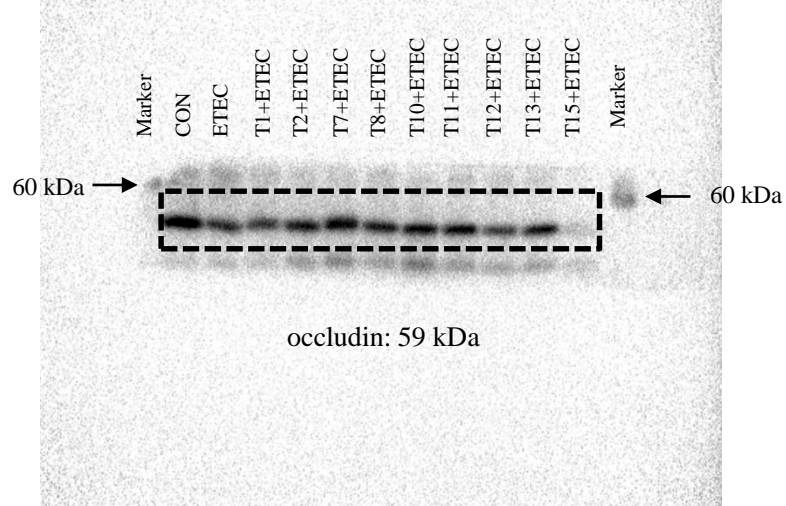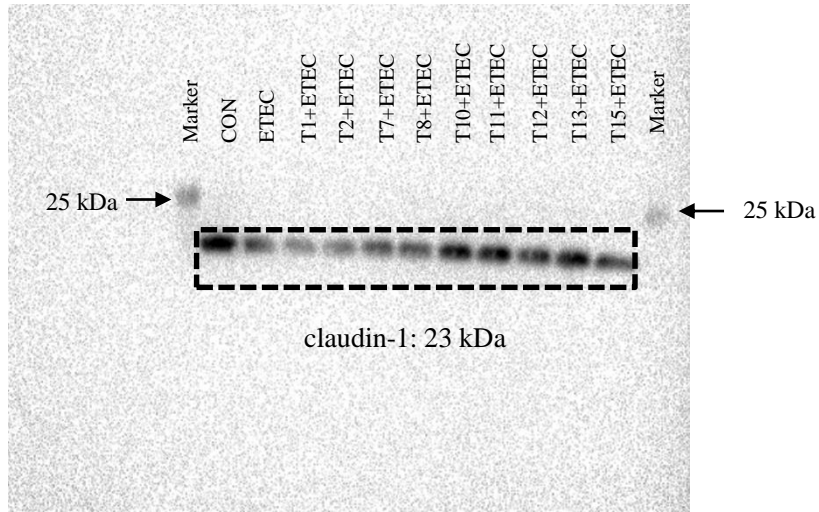

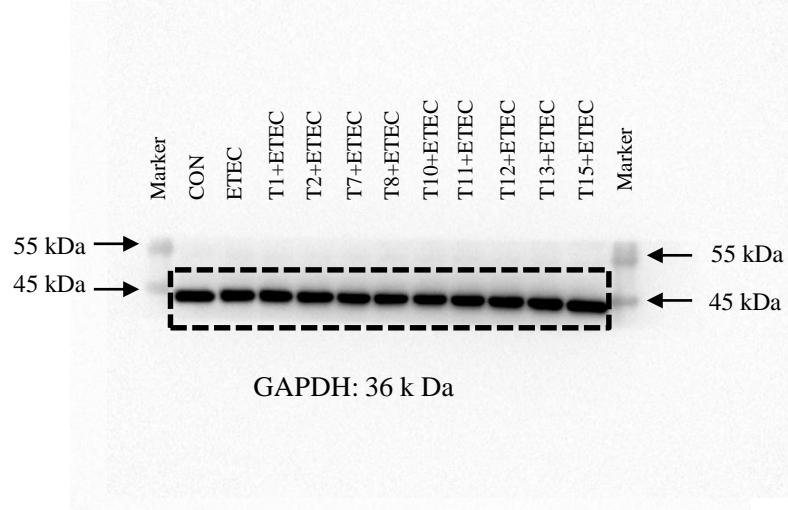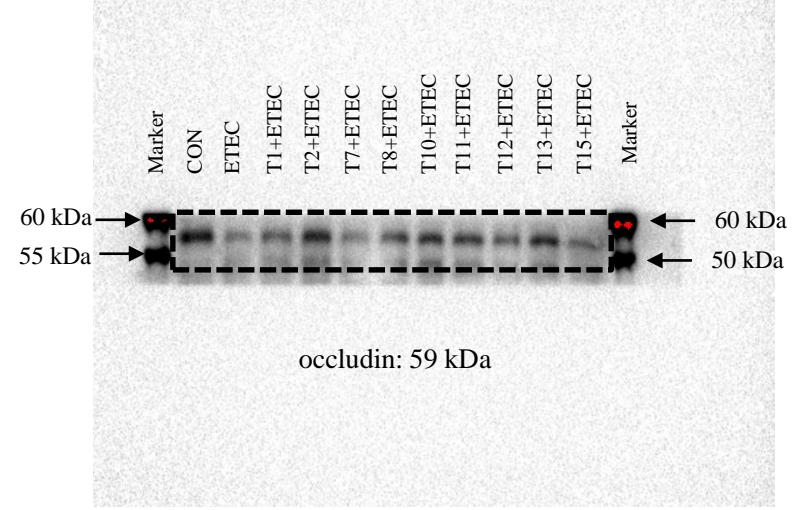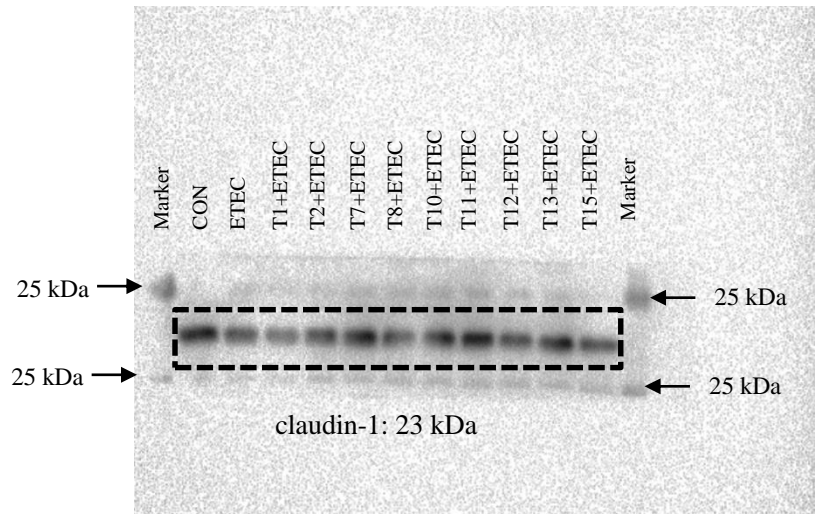

3

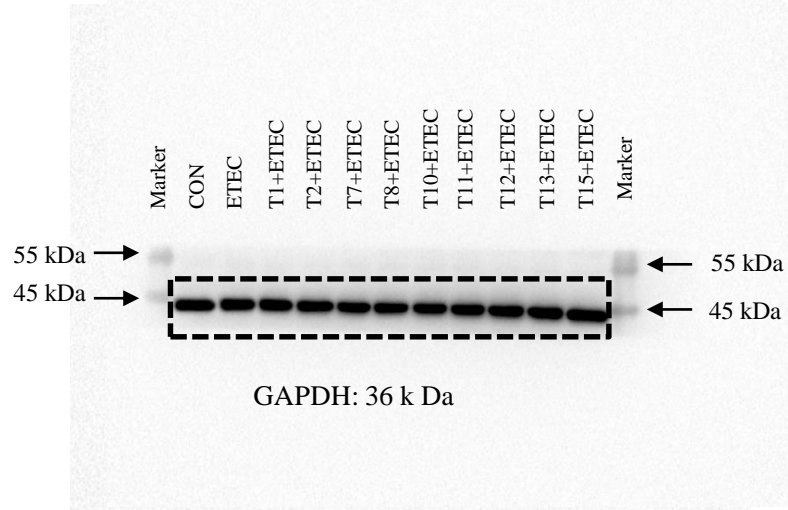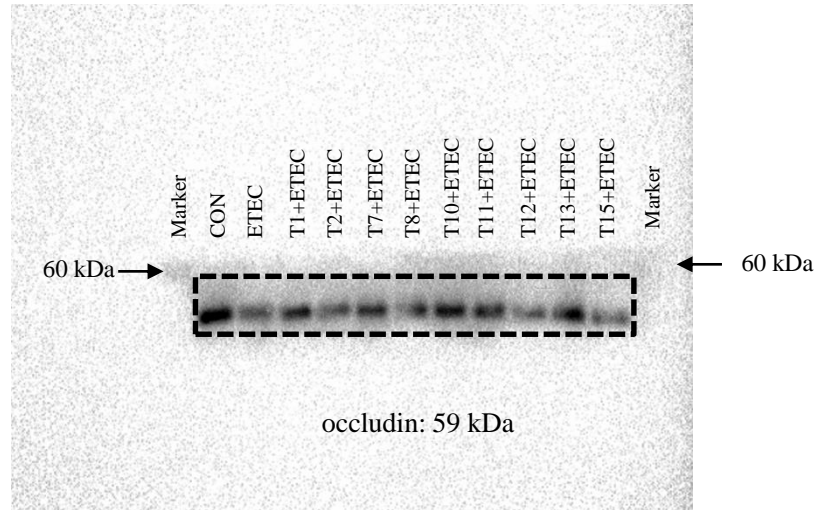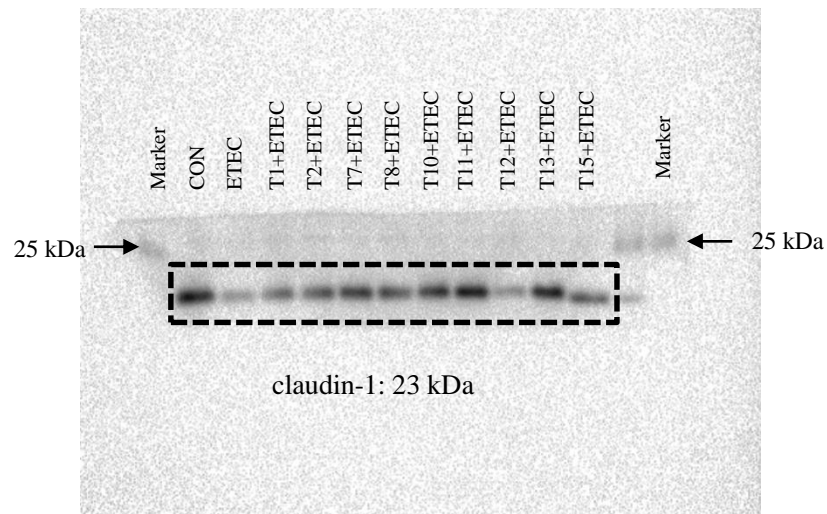

Supplement: d4fo00526k1.pdf [file d4fo00526k1.pdf]
