# Supplementary material for: Exopolysaccharide production by Lactobacillus plantarum T10 is responsible for the probiotic activity in enhancing intestinal barrier function in vitro and in vivo
Source: Royal Society of Chemistry journal article supplement (doi:10.1039/d4fo00526k), 2024-01-01

**Fig. 4** IPEC-J2 cells were pretreated with the EPS of *L. plantarum* T10 for 3 h and were subjected to a 6-h ETEC challenge.

Western blotting was used to assess the expression of p38, p-p38, caspase-8, and cleaved-caspase-8.



The following is the original plot of the above bands

1

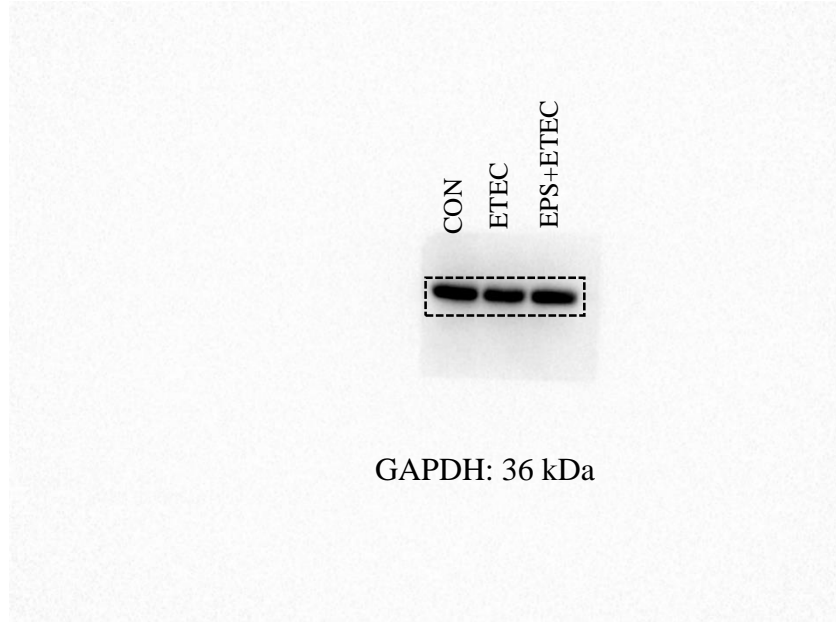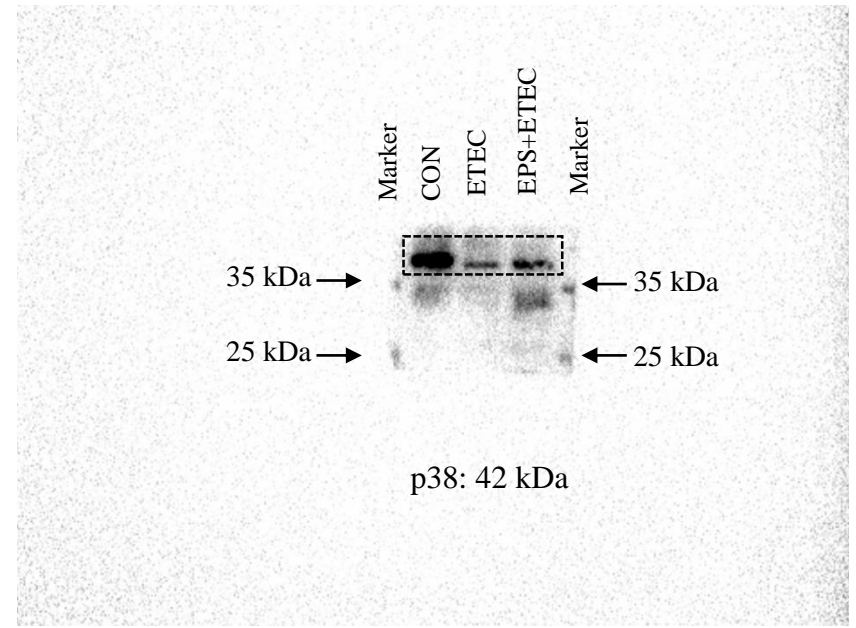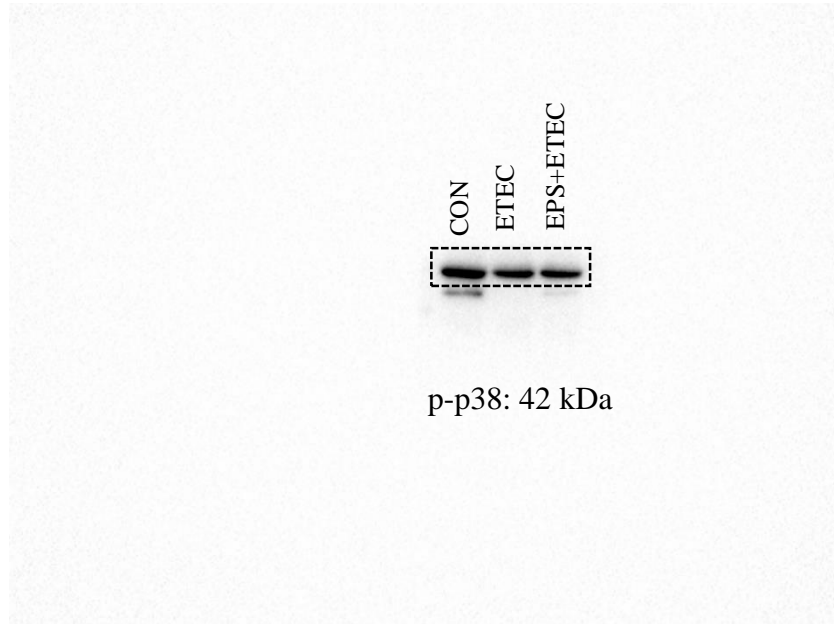

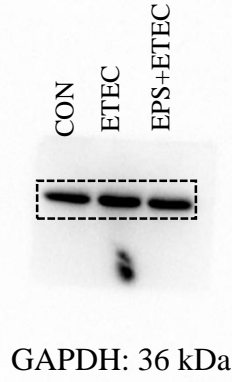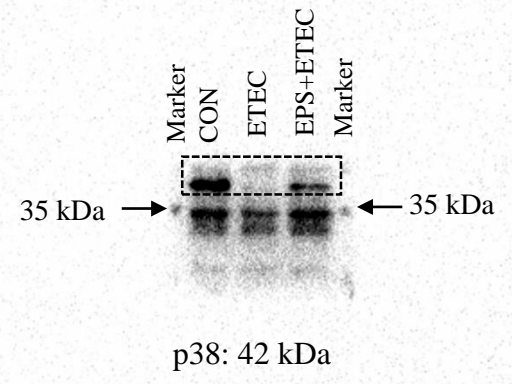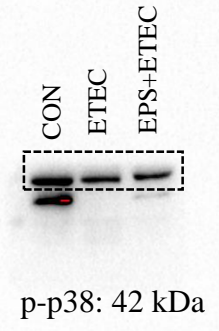

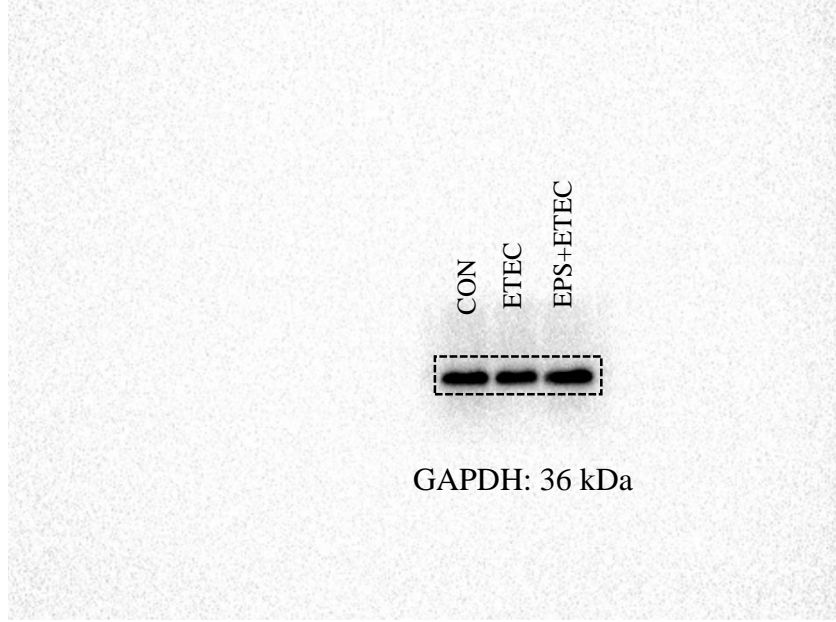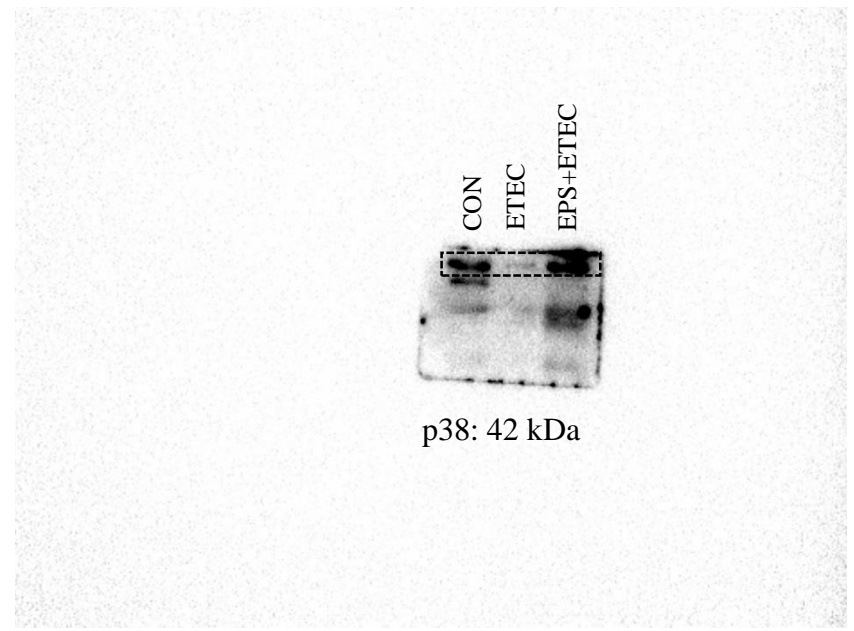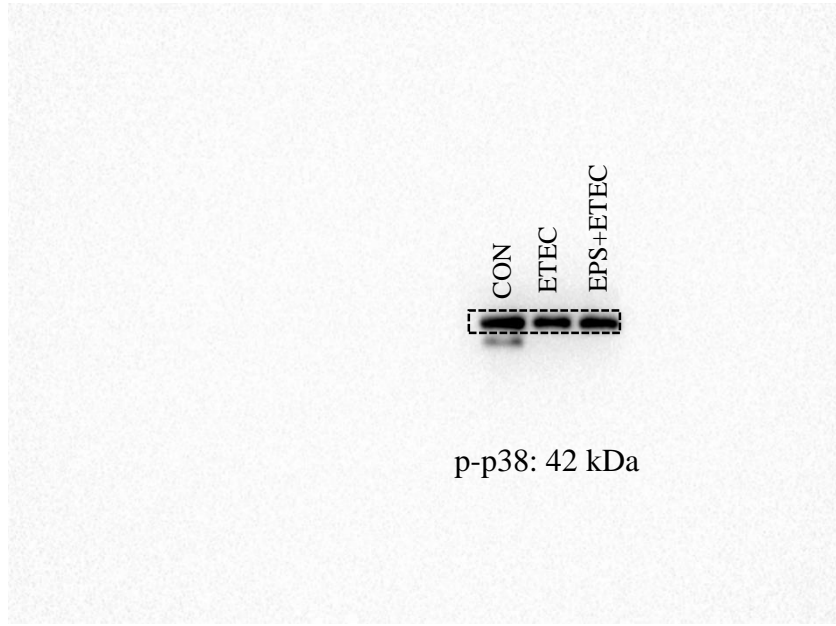

caspase-8 and cleaved-caspase-8 were cropped from following images

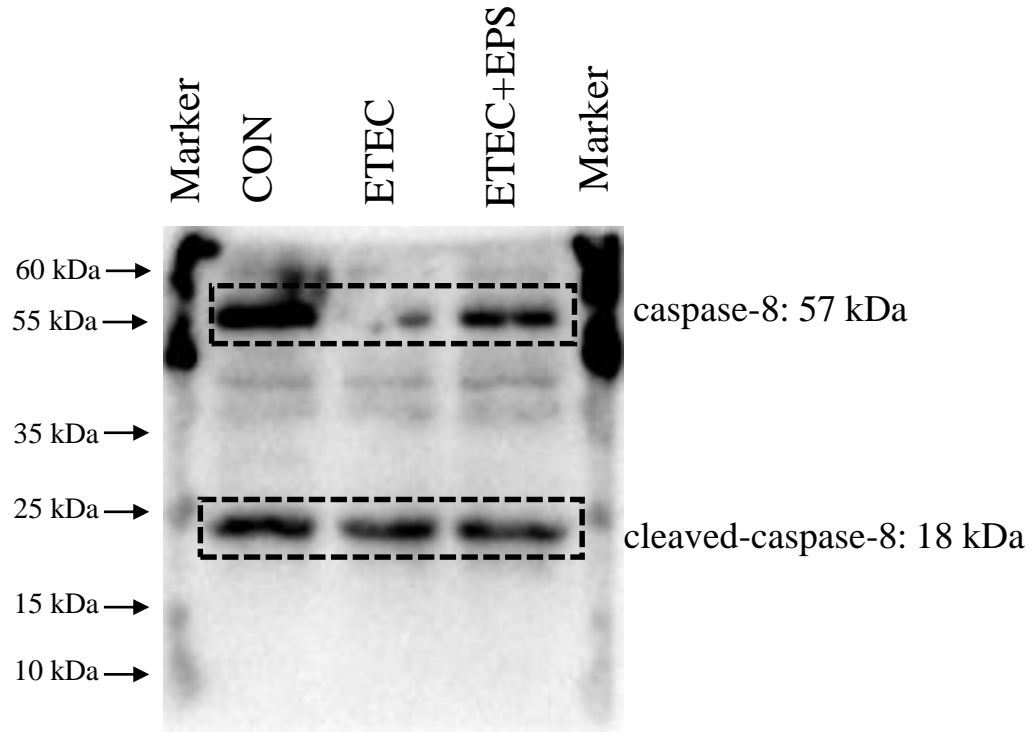

1

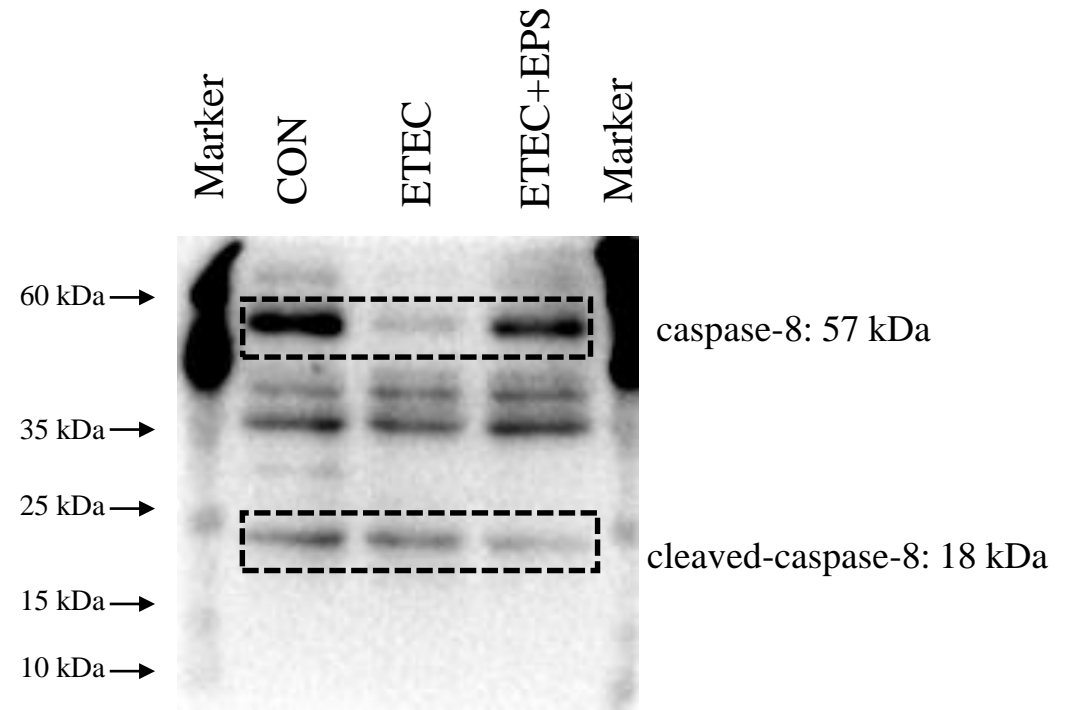

2

caspase-8 and cleaved-caspase-8 were cropped from following images

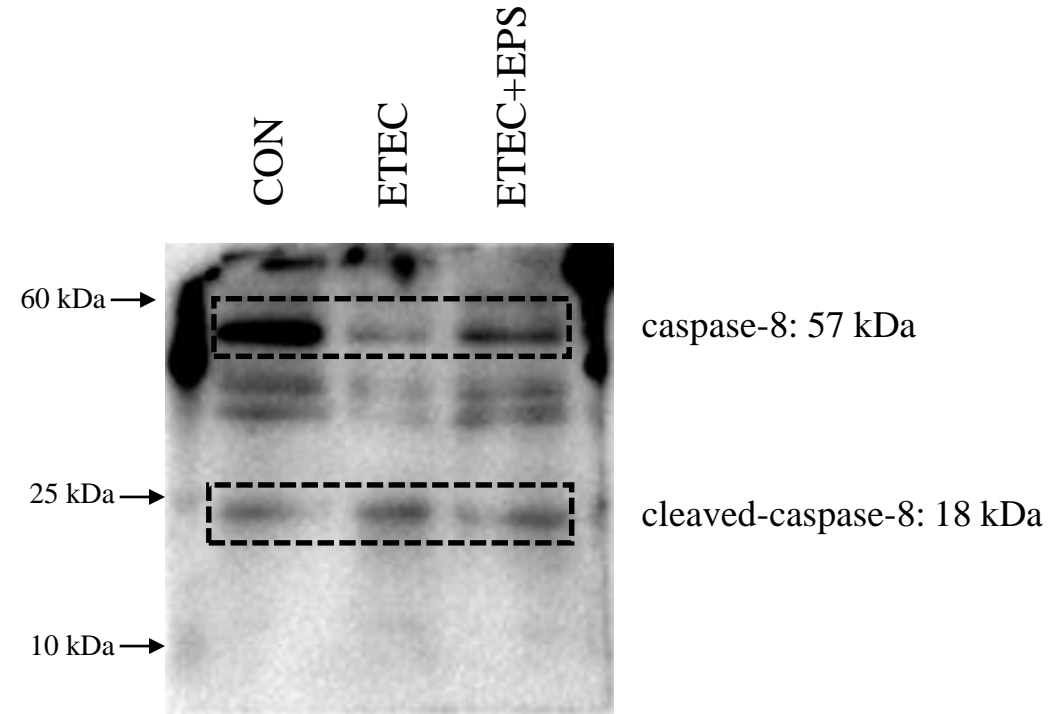

Supplement: d4fo00526k3.pdf [file d4fo00526k3.pdf]
