# Supplementary material for: Exopolysaccharide production by Lactobacillus plantarum T10 is responsible for the probiotic activity in enhancing intestinal barrier function in vitro and in vivo
Source: Royal Society of Chemistry journal article supplement (doi:10.1039/d4fo00526k), 2024-01-01

**Fig.6** The function of the intestinal barrier was enhanced *in vivo* by the EPS of *L. plantarum* T10

Western blotting was used to assess the claudin-1 and occludin expression.

# Results of 3 independent experiments

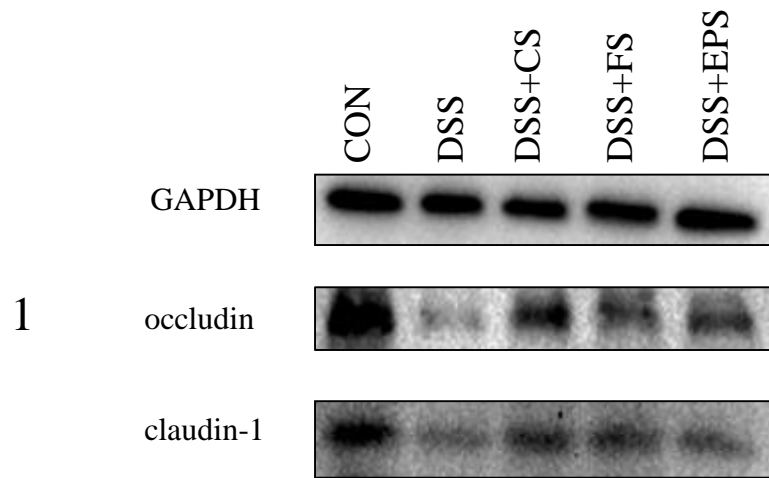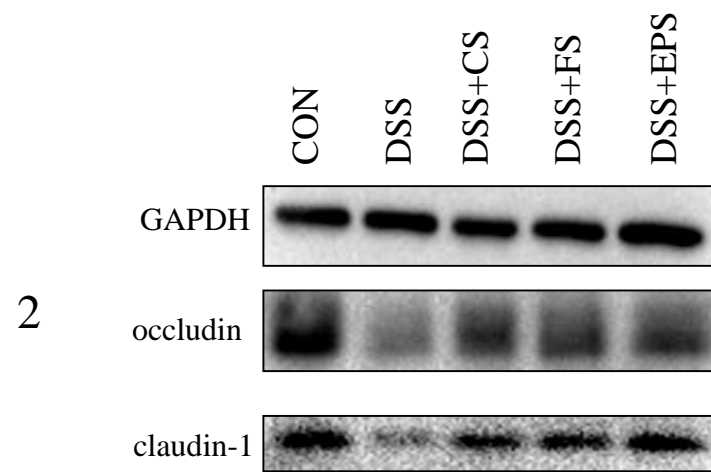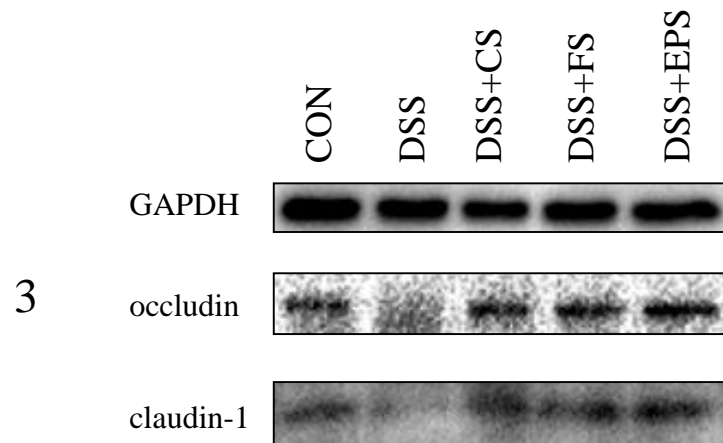

The following is the original plot of the above bands

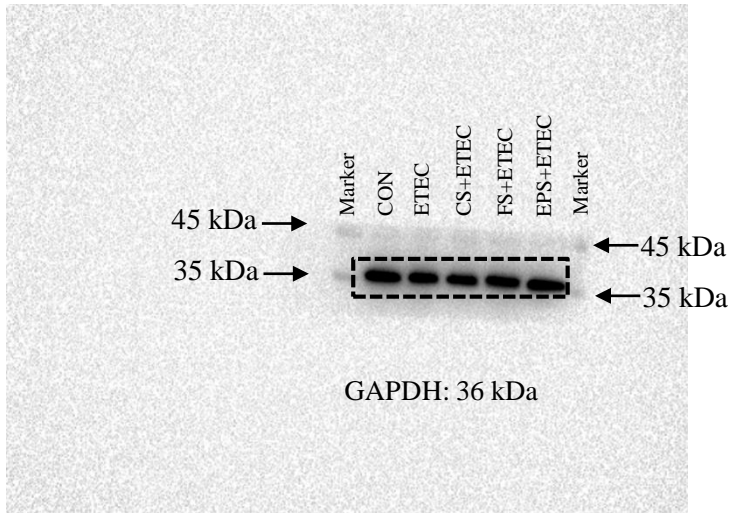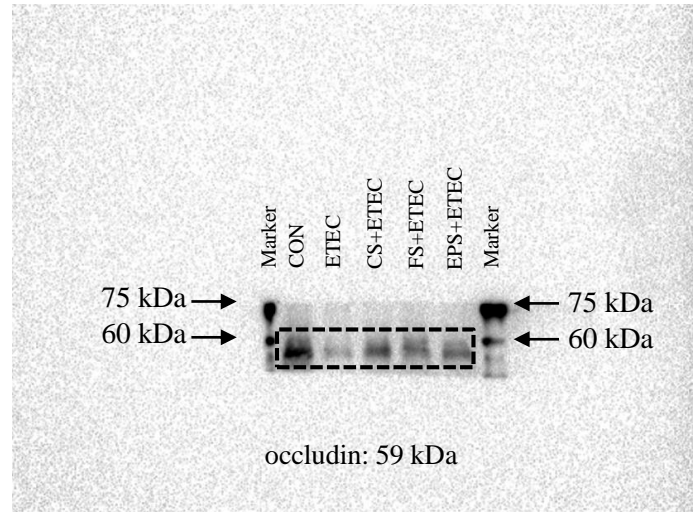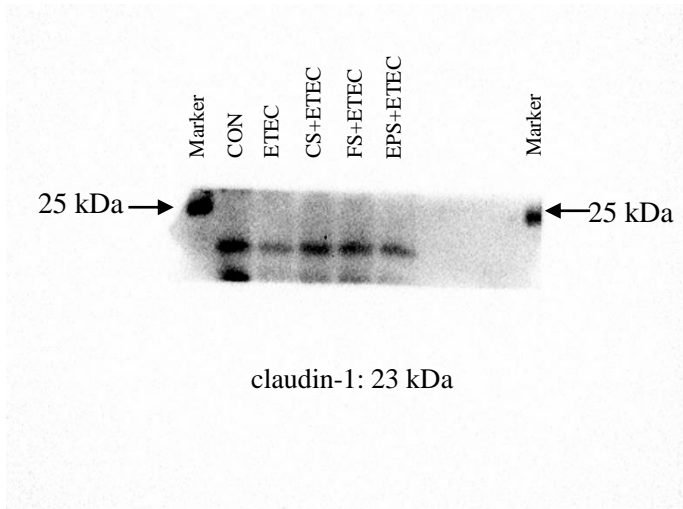

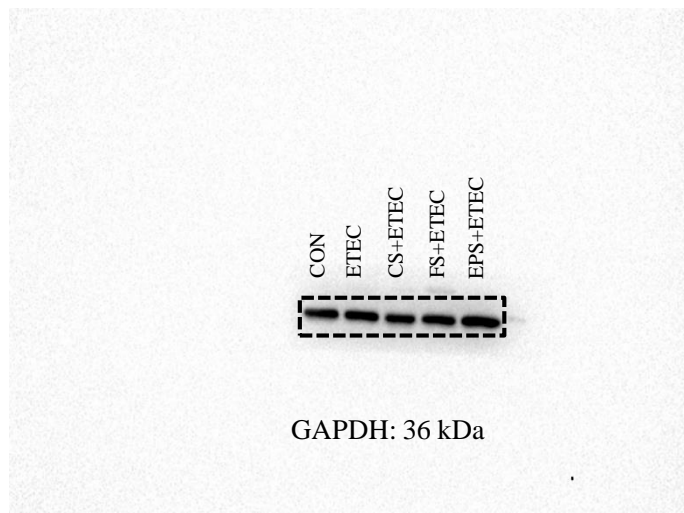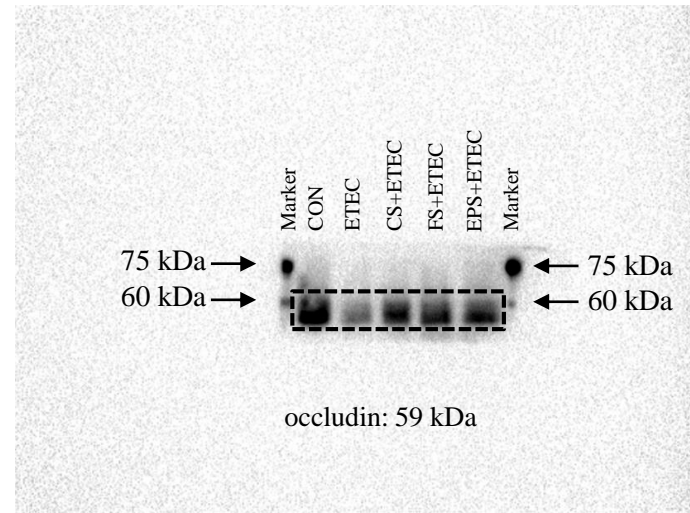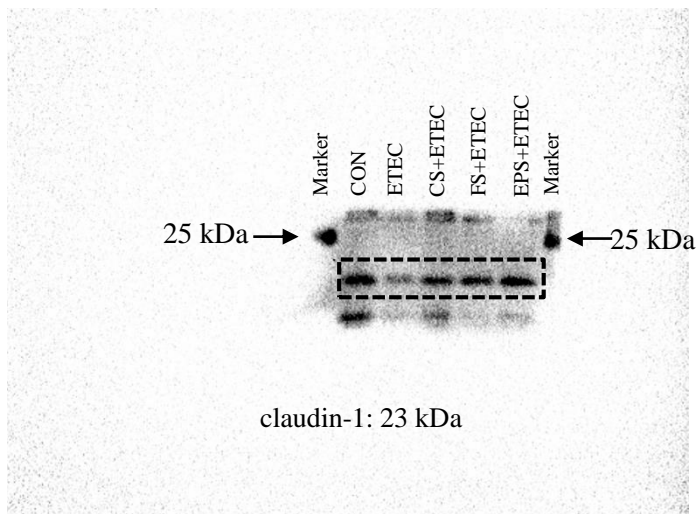

3

GAPDH

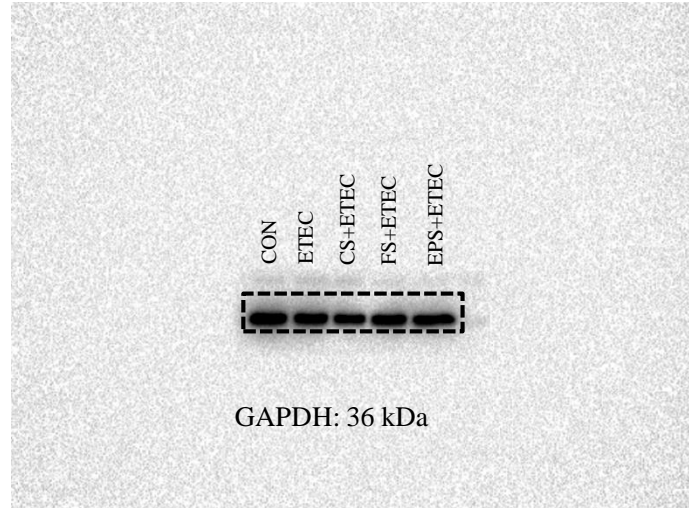

occludin

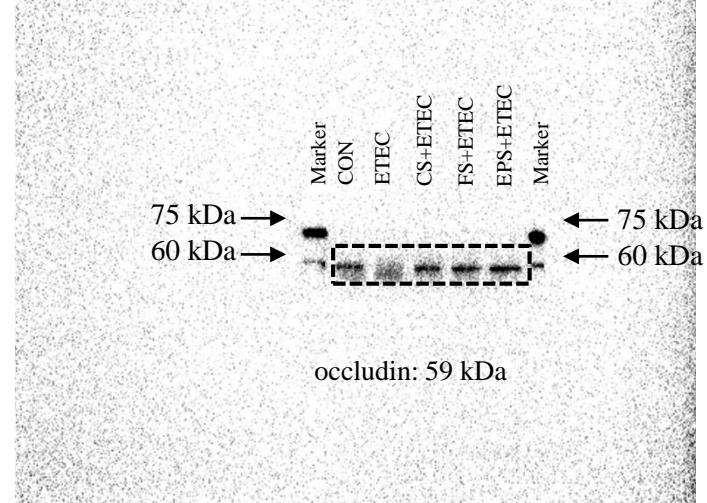

claudin-1

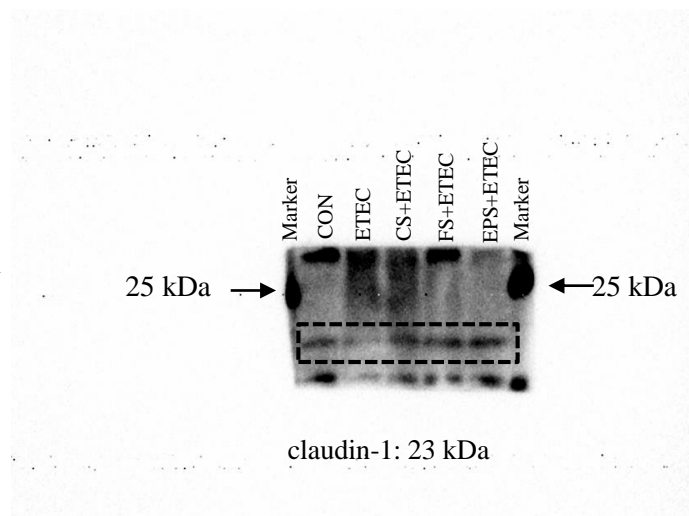

Supplement: d4fo00526k4.pdf [file d4fo00526k4.pdf]
